# Supplementary material
Source: PubMed Central journal article supplement (PMC2992793)

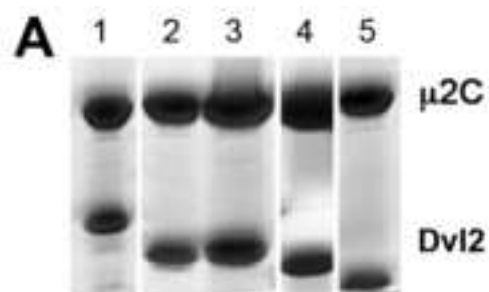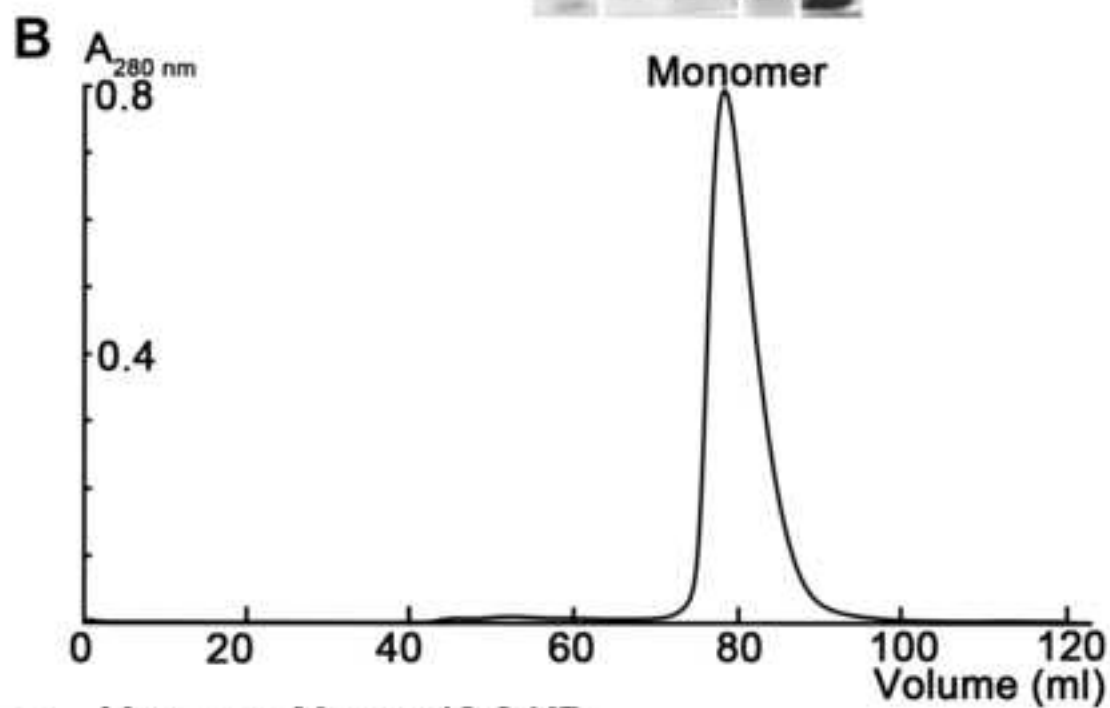

**C** Monomer Mass: 43.3 KDa  
Measured Mass:  $42.6 \pm 1.4$  KDa

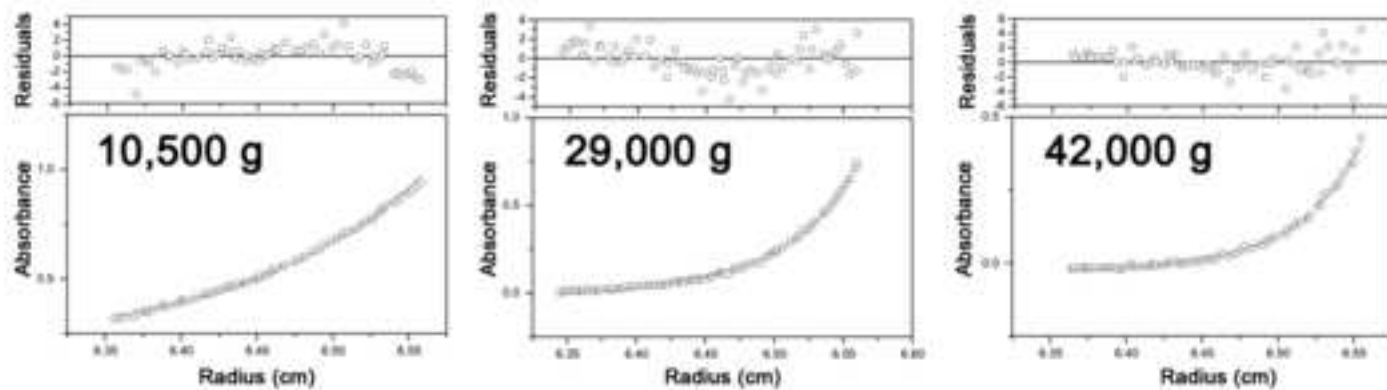

Supplement: NIHMS236191-supplement-01.pdf [file NIHMS236191-supplement-01.pdf]
